# Supplementary material
Source: publisher site journal article supplement (https://static.cambridge.org/content/id/urn:cambridge.org:id:article:S1355617719000146/resource/name/S1355617719000146supp001.doc)
Supplement: Supplementary file 1 [file S1355617719000146supp001.doc]

## Supplementary material. List of abbreviations used for the tools

| **Executive functions, ADHD and information processing speed** | | | | | | | | | | | | |
| --- | --- | --- | --- | --- | --- | --- | --- | --- | --- | --- | --- | --- |
| **AB**  **ANT**  **ANT (BS)**  **ANT (T)**  **ANT (P)**  **ANT (MS)**  **ANT (FA)**  **ANT (FL)**  **ANT (FI)**  **ANT (SA)**  **ANT (SASV)**  **ANTIS**  **ANTIS (RT)**  **ANTIS (E)**  **BRIEF**  **GEC**  **MI**  **BRI**  **CNT**  **CNT (E)**  **CNT (T)**  **CORSI**  **COWAT**  **CPT**  **CPT (O)**  **CPT (C)**  **CPT (RT)**  **DKEFS**  **DKEFS (S)**  **DKEFS (TMT)**  **DKEFS (FLG)**  **DKEFS (FLV)**  **DKEFS (TOW)**  **DKEFS (CWI)**  **DN** | | | AB Task  Amsterdam Neuropsychological Tasks  ANT – Baseline Speed  ANT – Tracking  ANT – Pursuit  ANT – Memory Search  ANT – Focused Attention  ANT – Flanker Interference  ANT – Feature Identification  ANT – Sustained Attention-Dots  ANT – Shifting Attentionnal Set-Visual  Antisaccade task  ANTIS – Reaction Time  ANTIS – Errors  Behavior Rating Inventory of Executive Function  General Executive Composite  Metacognitive Index  Behavior Regulation Index  Contingency Naming Test  CNT-Errors  CNT-Time  Corsi-Milner recency discrimination test  Word Association Test  Continuous Performance Test  CPT – Omissions  CPT – Commissions  CPT – Reaction Time  Delis-Kaplan Executive Function System  DKEFS- Sorting  DKEFS-Trail Making  DKEFS-Design Fluency  DKEFS-Verbal Fluency  DKEFS-Tower  DKEFS-Color Word Interference  Day-Night Stroop-like Test | | **d2**  **d2 (E)**  **d2 (RT**  **ELAB**  **FAS**  **FPT**  **FLANK**  **FLANK (RT)**  **FLANK (E)**  **FLV**  **FLV (P)**  **FLV (S)**  **FLV (PTot)**  **FLV (PClu)**  **FLV (PSwi)**  **FLV (STot)**  **FLV (SClu)**  **FLV (SSwi)**  **FR**  **IFE**  **GNG**  **GNG (O)**  **GNG (C)**  **GNG (RT)**  **MFFT**  **MML**  **NBACK**  **NBACK (RT)**  **NBACK (E)**  **OR**  **RFFT**  **RME**  **SCST**  **STROOP**  **STROOP (L)** | | | d2 Attention Test  d2 – Errors  d2 – Reaction Time  Elithorn’s Perceptual Maze Test  FAS task  Faux-Pas Recognition Test  Flanker Task  FLANK – Reaction Time  FLANK – Errors  Verbal Fluency  FLV – Phonemic  FLV – Semantic  FLV – Phonemic – Total Words  FLV – Phonemic – Clusters  FLV – Phonemic – Switches  FLV – Semantic – Total Words  FLV – Semantic – Clusters  FLV – Semantic – Switches  Facial Recognition  Identification of Facial Emotions  Go/No-Go  GNG – Omissions  GNG – Commissions  GNG – Reaction Time  Matching Familiar Figures Test  Luria Motor Motor Learning Test  NBACK task  NBACK – Reaction Time  NBACK – Errors  Object Retrieval Task  Ruff Figural Fluency Test  Reading the Mind in the Eyes Test  Social Cognitive Skills Test  Stroop Color and Word test  Stroop- Word reading | | **STROOP (I)**  **SOPT**  **SSRS**  **SRT**  **SVAT**  **SVAT (DPE)**  **SVAT (FMSE)**  **SVAT (LPE)**  **SVAT (CAE)**  **TAP**  **TEACh**  **TEACh (Sky)**  **TEACh (CT)**  **TEACh (Digit)**  **TEACh (DT)**  **TEACh (CC)**  **TEACh (WW)**  **TEACh (OW)**  **TEACh (MM)**  **TEACh (S)**  **TEACh (SDT)**  **TMT**  **TMTA (RT)**  **TMTB (RT)**  **TOH**  **TOL**  **VST**  **WCode**  **WLAB**  **WMT**  **Wsymb**  **WCST**  **WST**  **3P**  **3-6B** | | Stroop-Interference test  Self-Ordered Pointing Test  Social Skills Rating System  Simple reaction time task  Sonneville Visual Attention Task  SVAT – Dot Pattern Exercise  SVAT – Finger Motor Speed Exercise  SVAT – Letter Pattern Exercise  SVAT – Calculation Exercise  Tapping Task  Test of Everyday Attention for Children  TEA-Ch-Sky Search  TEA-Ch-Code Transmission  TEA-Ch-Digital Distraction  TEA-Ch-Sky Search Dual Task  TEA-Ch-Creature Counting  TEA-Ch-Walk / Don’t Walk  TEA-Ch-Opposite Worlds  TEA-Ch-Map Mission  TEA-Ch-Score!  TEA-Ch-Score! Dual Task  Trail Making Test  TMT – A – Reaction Time  TMT – B – Reaction Time  Tower Of Hanoï  Tower Of London  Visual Search Test  Weschler Scales Code  Weschler Mazes  Experimental Working Memory Tasks  Weschler Scales Symboles  Wisconsin Card Sorting Test  Weigl’s Sorting Test  Three Pegs Task  Three or Six Boxes Task |
| **Intellectual Efficiency** | | | | | | | | | | | | |
| **CFT-20**  **CMM**  **DDSTII**  **DDSTII (LGG)**  **DDSTII (MFA)**  **DDSTII (MG)**  **HAWIK-R** | | Culture Fair Intelligence Tests  Columbia Mental Maturity Scale  Denver Developmental Screening Test-II  DDSTII - Language  DDSTII - Motor Fine Adaptive  DDSTII - Gross Motor  Hamburg-Wechsler-Intelligenztest für Kinder | | **HAWIVA**  **HAWIVA (MT)**  **KABC**  **STB**  **TM**  **WAIS**  **WAIS-III** | | Hannover-Wechsler-Intelligenztest für das Vorschulalter  HAWIVA - Mathematical Thinking  Kaufman Assessment Battery for Children  Stanford-Binet Intelligence Scale  Terman-Merrill Test  Weschler Intelligence Scale for Adults  WAIS-3rd Edition | | | | | **WASI**  **(VIQ)**  **(PIQ)**  **(FSIQ)**  **WISC**  **WISC-R**  **WISC-III**  **WPPSI**  **WPPSI-R** | Wechsler Abbreviated Scale of Intelligence  Verbal IQ  Performance IQ  Full Scale IQ  Weschler Intelligence Scale for Children  WISC-Revised  WISC-3rd Edition  Wechsler Preschool and Primary Scale of Intelligence  WPPSI--Revised |
| **Visual perception, visual-spatial abilities and motor skills** | | | | | | | | | | | | |
| **BAS-2**  **BAS-2 (RD)**  **BAS-2 (PC)**  **DTVP**  **FT**  **GC**  **LOSKF18** | | British Abilities Scales 2nd edition  BAS-2 Recall of Designs  BAS-2 Pattern Construction  Frostig - Developmental Test of Visual Perception  Finger Tapping Task  Gestalt Closure subtest of KABC  Lincoln-Oseretzky-Skala | | **MLS**  **MLS (LP)**  **MLS (FT)**  **MLS (S)**  **MLS (FL)**  **MLS (A)**  **MLS (R)** | | Motorische Leistungsserie  MLS – Long Pins  MLS – Finger Tapping  MLS - Steadiness  MLS - Follow Lines  MLS - Aiming  MLS – Rotor | | | | | **NVT**  **PPT**  **ROCF (C)**  **Vistech**  **VMI**  **WJR**  **WJ (SR)** | Experimental Non-Verbal Tasks  Purdue Pegboard Test  Rey Osterreith Complex Figure - Copy  Visual Contrast Sensitivity Test  Woodcock Johnson – Revised  Beery- Developmental Test of Visual motor Integration  WJ – Spatial Relations |
| **Oral language and learning abilities** | | | | | | | | | | | | |
| **ACH**  **BAS-2**  **BAS-2 (WD)**  **BAS-2 (VS)**  **FLTAC**  **PET**  **SICD**  **TOLD-I**  **TOLD-P**  **TOLD-P (SE)** | | Achenbach questionnaire teacher’s rating  British Abilities Scales 2nd E.  BAS-2 Word Definitions  BAS-2 Verbal Similarities  Fisher-Logemann Test of Articulation Competence  Psycholinguistischer Entwicklungstest  Sequenced Inventory of Communication Development  Test of Language Development-Intermediate  Test of Language Development-Primary  TOLD-P – Composite Score for Semantics | | **TOLD-P (SY)**  **TOLD-P (LI)**  **TOLD-P (OR)**  **TOLD-P (SP)**  **TOLD-P (SL)**  **TOAL-2**  **WJR**  **WJR (LWI)**  **WJR (PC)**  **WJR (WS)** | | | TOLD-P – Composite Score for Syntax  TOLD-P – Composite Score for Listening  TOLD-P – Composite Score for Organizing  TOLD-P – Composite Score for Speaking  TOLD-P – Composite Score for Spoken  Test of Adolescent Language  Woodcock Johnson – Revised  WJR – Letter Word Identification  WJR – Passage Comprehension  WJR – Writing Samples | | | | **WJR (MC)**  **WJR (AP)**  **WJR (D)**  **WJR (PV)**  **WRAT**  **WRAT3**  **WRAT (S)**  **WRAT (R)**  **WRAT (A)** | WJR – Maths Calculation  WJR – Applied Problems  WJR – Dictation  WJR – Picture Vocabulary  Wide Range Achievement Test  WRAT – 3rd Edition  WRAT - Spelling  WRAT - Reading  WRAT - Arithmetic |
| **Memory** | | | |  | | | | | | |  | |
| **CVLT**  **CVLT (1)**  **CVLT (5)**  **CVLT (Clu)**  **CVLT (P)**  **CVLT (I)**  **CVLT (DR)** | California Verbal Learning Test  CVLT - Immediate Recall  CVLT – Trial 5 Number Correct  CVLT – Semantic Cluster Ratio  CVLT – Perseverations  CVLT – Intrusions  CVLT – Delay Recall | | | **RAVLT**  **RAVLT (Tot)**  **RAVLT (1)**  **RAVLT (5)**  **ROCF (M)** | | | | | Rey Auditory Verbal Learning Test  RAVT - Total words recalled  RAVT – Immediate Recall  RAVT - Trial 5 Number Correct  Rey Osterreith Complex Figure - Memory | | **RVDLT**  **RVDLT (Tot)**  **RVDLT (1)**  **VLT** | Rey Visual Design Learning Test  RVDLT – Total designs recalled  RVDLT – Immediate Recall  Verbal Learning Task |
